---

1 **Interpretable machine learning framework reveals novel gut microbiome**  
2 **features in predicting type 2 diabetes**

3 Wanglong Gou<sup>1#</sup>, Chu-wen Ling<sup>2#</sup>, Yan He<sup>3#</sup>, Zengliang Jiang<sup>1,5#</sup>, Yuanqing Fu<sup>1,5</sup>,  
4 Fengzhe Xu<sup>1</sup>, Zelei Miao<sup>1</sup>, Ting-yu Sun<sup>2</sup>, Jie-sheng Lin<sup>2</sup>, Hui-lian Zhu<sup>2</sup>, Hongwei  
5 Zhou<sup>3,4\*</sup>, Yu-ming Chen<sup>2\*</sup>, Ju-Sheng Zheng<sup>1,5†\*</sup>

6

7 <sup>#</sup>These authors contributed equally to the work

8 <sup>†</sup>The Lead Contact

9 <sup>1</sup> School of Life Sciences, Westlake University, Hangzhou, China;

10 <sup>2</sup> Guangdong Provincial Key Laboratory of Food, Nutrition and Health; Department of  
11 Epidemiology, School of Public Health, Sun Yat-sen University, Guangzhou, China.

12 <sup>3</sup> Microbiome Medicine Center, Division of Laboratory Medicine, Zhujiang Hospital,  
13 Southern Medical University, Guangzhou, China

14 <sup>4</sup> State Key Laboratory of Organ Failure Research, Southern Medical University,  
15 Guangzhou, China

16 <sup>5</sup> Institute of Basic Medical Sciences, Westlake Institute for Advanced Study,  
17 Hangzhou, China.

18

19 Short title: Novel gut microbiome features and type 2 diabetes

20

21 \*Correspondence to

22 Prof Ju-Sheng Zheng

23 School of Life Sciences, Westlake University, 18 Shilongshan Rd, Cloud Town,

24 Hangzhou, China. Tel: +86 (0)57186915303. Email: zhengjusheng@westlake.edu.cn

25 And

---

26 Prof Yu-Ming Chen

27 Guangdong Provincial Key Laboratory of Food, Nutrition and Health; Department of

28 Epidemiology, School of Public Health, Sun Yat-sen University, Guangzhou, China.

29 Email: [chenyum@mail.sysu.edu.cn](mailto:chenyum@mail.sysu.edu.cn)

30 And

31 Prof Hongwei Zhou

32 Microbiome Medicine Center, Division of Laboratory Medicine, Zhujiang Hospital,

33 Southern Medical University, Guangzhou, China. Email: [hzhou@smu.edu.cn](mailto:hzhou@smu.edu.cn)

34

35

36

37

38

39

40

41

42

43

44

45

46

47

48

49

50

51

52

53

---

54 **Highlights**

- 55 • New interpretable machine-learning analytic framework identifies a combination  
56 of microbes consistently associated with type 2 diabetes risk across three  
57 independent cohorts involving 9111 participants
- 58 • Faecal microbiota transplantation from humans to germ-free mice demonstrates a  
59 causal role of the identified combination of microbes in the type 2 diabetes  
60 development
- 61 • Body shape could modify the gut microbiome-diabetes relationship

---

62 **Abstract**

63 Gut microbiome targets for type 2 diabetes (T2D) prevention among human cohorts  
64 have been controversial. Using an interpretable machine learning-based analytic  
65 framework, we identified robust human gut microbiome features, with their optimal  
66 threshold, in predicting T2D. Based on the results, we constructed a microbiome risk  
67 score (MRS), which was consistently associated with T2D across 3 independent  
68 Chinese cohorts involving 9111 participants (926 T2D cases). The MRS could also  
69 predict future glucose increment, and was correlated with a variety of gut microbiota-  
70 derived blood metabolites. Faecal microbiota transplantation from humans to germ-  
71 free mice demonstrated a causal role of the identified combination of microbes in the  
72 T2D development. We further identified adiposity and dietary factors which could  
73 prospectively modulate the MRS, and found that body fat distribution may be the key  
74 factor modulating the gut microbiome-T2D relationship. Taken together, we proposed  
75 a new analytical framework for the investigation of microbiome-disease relationship.  
76 The identified microbiota may serve as potential drug targets for T2D in future.

---

77 **Introduction**

78 Type 2 diabetes (T2D) is a complex disorder influenced by both host genetic and  
79 environmental factors (1), and its prevalence is rising rapidly in both developed and  
80 developing countries (2). Gut microbiome is considered as a modifiable  
81 environmental factor, which plays an important role in the development of T2D (3–7).  
82 The research interest to identify gut microbiome-related treatment/prevention target is  
83 emerging recently (8). Although there are a few human studies investigating the  
84 association of gut microbiome with T2D in the past few years, the results are  
85 inconsistent, and the causality is lacking (9). So far, there are sparse human evidence  
86 robustly linking specific gut microbiome features to T2D.

87

88 Machine learning has been widely used in biomedical fields in recent years (10).  
89 However, its application in the clinical setting is still limited as their predictions are  
90 usually difficult to interpret. Of note, with the methodology development in the past  
91 few years, interpretable algorithms could unlock the traditional “black box” of  
92 machine learning results (11). The integration of the new algorithms with large-scale  
93 gut microbiome data have the potential to radically unveil the relationship between  
94 gut microbiome and T2D. Yet, no such investigation has been done.

95

96 Therefore, in the present study, we aimed to identify robust human gut microbiome  
97 features in predicting T2D with a novel interpretable machine learning analytical  
98 framework in large-scale human cohort studies. We also assessed the correlation  
99 between the combination of microbes and host blood metabolites to provide insight  
100 into the role of T2D-related gut microbiota in host metabolism. We further performed  
101 a faecal microbiota transfer experiment to establish the causality of the identified

---

102 combination of microbes on the T2D development. As a secondary objective, we  
103 aimed to identify potential adiposity, dietary and lifestyle factors which could modify  
104 the T2D-related gut microbiota using our longitudinal cohort data.

105

## 106 **Results**

### 107 **Linking host multi-dimensional information and T2D based on a machine**

#### 108 **learning method**

109 The characteristics of the participants for the current study are shown in Table 1, and  
110 the overview of the study workflow is shown in Fig.1 and Fig.S1. 297 host features  
111 (metadata, gut microbiota composition, and gut microbiota diversity, see  
112 Supplemental text) were incorporated into our analyses. The metadata were collected  
113 at the same point-in-time as the stool sample. Prevalent T2D cases were ascertained  
114 on the basis of fasting blood glucose  $\geq 7.0$  mmol/L or HbA1c  $\geq 6.5\%$  or currently  
115 under medical treatment for diabetes at either of the follow-up visits, according to the  
116 American Diabetes Association criteria for the diagnosis of diabetes (12). We used  
117 LightGBM (13), a Gradient Boosting Decision Tree (GBDT) algorithm, to infer the  
118 relationship between incorporated features and T2D (Materials and Methods). Our  
119 machine learning model showed a high and robust performance for the prediction of  
120 T2D (AUC=0.86~0.89) in the discovery and external validation cohort 1 (Fig.2A, and  
121 Table S1). The LightGBM algorithm used in the present study outperformed the  
122 random forest algorithm in the T2D prediction (Table S2).

123

#### 124 **Factors underlying T2D prediction**

125 To gain insight into the contribution of the different features in the algorithm's  
126 prediction, we used SHapley Additive explanation (SHAP) (11) to interpret the

---

127 machine learning model. Features with an average absolute SHAP value greater than  
128 0 were used as selected features. We finally identified 21 features associated with the  
129 risk of T2D, of which 15 were microbiome features (two of them are indicators of  
130 microbial diversity, others are taxa-related features) (Fig.2B, Fig.S2 and Table S3),  
131 and the majority of the selected microbiome features had a low to modest  
132 intercorrelation (Fig.2, C to D, and Table S4). The selected features from the model  
133 showed a similar predictive capacity compared to all input features (Fig.2E, and Table  
134 S1).

135

136 We explored the marginal effect of each selected feature on T2D risk accounting for  
137 other features to examine how a single selected feature affected the output of the  
138 machine learning model. We created a SHAP dependence plot to show the effect of a  
139 single feature across the whole dataset (Fig.S3). Our results indicated that individuals  
140 with age >66.7 years or waist circumference >84.6cm were considered at high risk of  
141 T2D (Fig.S3). This is consistent with the standards of medical care for T2D in China  
142 (14, 15), which suggests that individuals >65 years old or with waist  
143 circumference >85cm (male) or 80cm (female) are at high risk of T2D. These results  
144 further demonstrated the validity of our novel machine learning-based analytic  
145 framework.

146

147 We identified the optimal threshold of the identified 13 taxa-related features according  
148 to their SHAP dependence plots (Table S5). 8 of 13 taxa-related features showed  
149 statistically significant associations with T2D when they were treated as binary  
150 variables: high abundance (i.e.,  $\geq$  the optimal threshold) compared to low abundance  
151 (i.e.,  $<$  the optimal threshold) (Fig.S4, A, and Table S6), while only 3 taxa-related

---

152 features showed significant association with T2D if the abundance of the selected  
153 microbiome was treated as a continuous variable (Fig.S4, B, and Table S6). These  
154 results highlight the importance of our interpretable machine learning framework to  
155 identify the optimal threshold for the individual microbes, suggesting that a linear  
156 model may not be suitable for microbiome analysis.

157

### 158 **The identified combination of microbes is strongly predictive of T2D risk**

159 To estimate individual microbiome risk for T2D development, we generated a  
160 microbiome risk score (MRS) integrating the threshold and direction of the above-  
161 identified microbial features (13 taxa-related features and observed species) to predict  
162 T2D risk (Materials and Methods). The MRS (ranges from 0-14) showed superior  
163 T2D prediction accuracy compared to the host genetics (T2D genetic risk score),  
164 Framingham-Offspring Risk Score (FORS) components (age, sex, parental history of  
165 diabetes, BMI, systolic blood pressure, high-density lipoprotein cholesterol,  
166 triglycerides, and waist circumference), lifestyle and dietary factors (current smoking  
167 status, current tea-drinking, current alcohol drinking, physical activity, total energy  
168 intake, vegetable intake, fish intake, red and processed meat intake, fruit intake and  
169 yogurt intake) (Fig.2F, and Table S7). An addition of the MRS to the model (FORS +  
170 lifestyle + diet) increased the AUC from 0.63 (95% CI 0.55-0.71) to 0.73 (95% CI  
171 0.66-0.8) in the internal validation cohort ( $P=0.0024$ ), 0.66 (95% CI 0.57-0.76) to  
172 0.73 (95% CI 0.65-0.82) in the internal test cohort ( $P=0.016$ ), and 0.51 (95% CI 0.45-  
173 0.57) to 0.64 (95% CI 0.56-0.71) in the external validation cohort 1 ( $P=0.0036$ ),  
174 respectively.

175

176 We found that the MRS (per unit change in MRS) consistently showed positive



---

177 association with T2D risk in the discovery cohort (RR 1.28, 95%CI 1.23-1.33),  
178 external validation cohort 1 (RR 1.23, 95%CI 1.13-1.34) and external validation  
179 cohort 2 (RR 1.12, 95%CI 1.06-1.18) (Fig.3A, Table 2, and Table S8). We also  
180 repeated the MRS-T2D association based on 1068 deep shotgun metagenomics  
181 samples in the discovery cohort (including 159 T2D cases). In agreement with the 16S  
182 RNA results, the metagenome-based MRS consistently showed positive association  
183 with T2D risk (per unit change in new MRS: RR 1.33, 95%CI 1.17-1.51) (Fig.3A, and  
184 Table S8).

185

186 **The identified combination of microbes is longitudinally related with glucose**  
187 **increments**

188 In order to investigate the relationship between the identified combination of microbes  
189 (i.e., MRS) and glucose increments longitudinally. We conducted a prospective  
190 investigation among 249 GNHS cohort participants with normal fasting glucose  
191 (fasting glucose <7 mmol/l) at baseline, who were followed up for a median of 3.4  
192 years after the collection of stool samples. Linear regression was used to calculate the  
193 correlation coefficient (Beta) and 95% confidence interval (CI) of glucose increments  
194 per unit higher in the MRS after adjusting for age, sex, BMI, waist circumference,  
195 smoking status, household income, alcohol drinking status, total energy intake,  
196 marital status and education level (model 1). We also conducted a sensitivity analysis  
197 to test the influence of baseline fasting glucose on the performance of our model by  
198 including baseline fasting glucose into the model. Our results showed that MRS was  
199 significantly positively associated ( $P<0.05$ ) with future glucose increments in two  
200 statistical models (Fig.3B, and Table S9). These results indicate that our identified  
201 combination of microbes could predict future glucose status among non-T2D

---

202 participants.

203

204 **Correlation of the identified combination of microbes with host blood**

205 **metabolome**

206 We performed targeted metabolomics profiling of serum samples from the discovery  
207 cohort (n=903) and external validation 1 (n=113), and assessed the correlation of the  
208 T2D-related combination of microbes (i.e., MRS) with 199 serum metabolites  
209 (Supplemental text). Participants with a history of the T2D medication use were  
210 excluded in this analysis. The serum samples were collected at the same point-in-time  
211 as the stool samples. We found the MRS was consistently correlated with 6  
212 metabolites in the discovery cohort and external validation cohort 1 (Fig.3C).

213

214 The MRS was negatively correlated with 2-phenylpropionate, hydrocinnamic acid and  
215 indole-3-propionic acid, which were all associated with gut microbiome metabolism  
216 (16–18). Deoxycholic acid and deoxycholic acid glycine conjugate are secondary bile  
217 acids produced by the action of enzymes existing in the microbial flora of the colonic  
218 environment (19). Recent studies have revealed that alteration of gut microbiota could  
219 not only affect the bile acid pool, but also influence the bile acid receptor signaling  
220 (i.e., FXR and TGR5). The FXR has been reported to be involved in glucose  
221 homeostasis, energy expenditure, and lipid metabolism (20). These observations  
222 provide insight into the potential function and mechanism of our identified microbial  
223 features, represented by the MRS, in host metabolism.

224

225 **The identified combination of microbes causally affect the T2D development in**

226 **germ-free mice**

---

227 To determine the causality between the identified combination of microbes and T2D  
228 risk, we transferred human faecal samples to germ-free mice to investigate the effects  
229 of the identified microbiota on T2D development (Fig.3D, Materials and Methods).  
230 Mice transplanted with the gut microbiota from high MRS individuals, either at non-  
231 T2D or T2D status, showed significant increase in fasting glucose levels compared  
232 with those from the low MRS individuals or germ-free control mice (Fig.3E to F).  
233 There was no significant difference in fasting glucose between the germ-free control  
234 group and the low MRS group. The mice weight of each group during follow-up was  
235 shown in Fig.S5 A to B. These results provide evidence for a causal relationship of the  
236 selected gut microbial features with T2D risk.

237

### 238 **Baseline adiposity and dietary factors can modulate the T2D-related microbiome**

239 We examined whether the MRS could be modulated by baseline adiposity, dietary or  
240 lifestyle factors (components see table S10). In the longitudinal analysis of the  
241 discovery cohort, baseline BMI were positively associated with the MRS, while hip  
242 circumference and tea-drinking was inversely associated (Fig.4A, and Table S10).

243

### 244 **Body shape is associated with gut microbiome, modulating the association of gut 245 microbiome with T2D**

246 Obesity is a most important risk factor of T2D (21). As BMI and hip circumference  
247 are closely correlated with the MRS in our study, we hypothesized that the  
248 relationship of gut microbiome with T2D might be modulated by the adiposity status.  
249 The MRS was positively associated ( $P<0.05$ ) with the distribution of trunk to limb fat  
250 ratio (trunk/limb fat mass ratio) in the discovery cohort and external validation cohort  
251 1 (Fig.4B and Table S11-Table S12). We found a significant interaction between MRS

---

252 and trunk/limb fat mass ratio for T2D risk in the discovery cohort ( $P_{\text{interaction}}=0.012$ )  
253 and external validation cohort1 ( $P_{\text{interaction}}=0.037$ ), adjusted for potential confounders  
254 (Fig.4E). In the discovery cohort, adjusted risk ratio (95% CIs) of T2D according to  
255 tertiles of the trunk/limb fat mass ratio was 1 (reference), 1.83 (0.86-3.88) and 3.61  
256 (1.81-7.18) in the lowest MRS tertile, and 4.5 (2.21-9.17), 6.14 (3.12-12.08) and  
257 11.79 (6.28-22.16) in the highest MRS tertile. Similar interaction results were found  
258 in the external validation cohort 1 (Fig.4C, and Table S13).

259

## 260 **Discussion**

261 In the present study we identify robust combination of microbes in predicting T2D by  
262 integrating a cutting-edge interpretable machine learning framework with large-scale  
263 human cohort studies. We construct a novel risk score for the gut microbiome, which  
264 shows superior T2D prediction accuracy compared to host genetics or traditional risk  
265 factors. Additionally, we successfully replicate the MRS-T2D association in another  
266 two independent cohorts. We then reveal that the MRS is correlated with a few gut  
267 microbiota-derived blood metabolites. The faecal microbiota transfer experiment  
268 confirmed the causality of the identified combination of microbes on T2D  
269 development. Finally, we identify potential baseline factors which could modulate the  
270 T2D-related microbiome features, and demonstrate that the relationship between the  
271 microbiome and T2D could be modified by the body fat distribution.

272

273 Microbiome data are highly dimensional, underdetermined, over-dispersed, and often  
274 sparse with excess zeros. These features challenge standard statistical tools, making  
275 results from both traditional parametric and non-parametric models unsatisfactory  
276 (22). On the other hand, multiple host anthropometric, dietary and lifestyle factors

---

277 play important roles in shaping the microbiome composition (23–25); while large  
278 human cohorts that taking into account these confounders are necessary but are so far  
279 sparse. The machine learning algorithm (LightGBM) we used to integrate host  
280 demographic, clinical, dietary, lifestyle and microbiome profiles outperformed the  
281 random forest algorithm in the T2D prediction. We also interpret the results of the  
282 ‘black box’ machine learning models with a recently developed novel tool: SHAP  
283 (11). Compared with other interpreting methods such as gain, split count and  
284 permutation method, SHAP has been theoretically verified as the only consistent and  
285 locally accurate method to interpret machine learning results (26). We demonstrated  
286 that our new analytic framework could effectively integrate data from different  
287 dimensions and subsequently unlocking the machine learning-generated ‘black box’  
288 results. This analytic framework could be used for other multi-omics research as well,  
289 beyond gut microbiome.

290

291 The first published human cohort study examining the difference of gut microbiome  
292 between T2D cases (n=18) and healthy controls (n=18) found that proportions of  
293 phylum *Firmicutes* and class *Clostridia* were significantly reduced in the T2D group  
294 compared to the control group (5). However, these results were not confirmed in  
295 another two small human gut microbiome studies conducted in China and Europe (27,  
296 28). Although results from the above two studies (27, 28) suggested that functional  
297 alterations of the gut microbiome might be directly linked to T2D development, the  
298 most discriminatory microbial markers for T2D differ between the two studies.

299

300 Most of our identified T2D-related taxa were from the order *Clostridiales*  
301 (*f\_mogibacteriaceae*, *g\_clostridiaceae spp*, *g\_butyrivibrio*, *g\_roseburia*,

---

302 *g\_megamonas, g\_mogibacteriaceae spp, g\_dorea, s\_dispar*), which were consistently  
303 enriched in the healthy controls, rather than T2D cases. Specifically, *roseburia*, which  
304 is decreased in our T2D patients, is a butyrate-producing genus and has been shown to  
305 causally improve glucose tolerance (29, 30). A previous study has demonstrated that  
306 reduction in the diversity and function of the class *Clostridia* contributes to the  
307 obesity development potentially via down-regulated genes that control lipid  
308 absorption (31). Therefore, the potential effect of *Clostridia* on obesity may explain  
309 our observed interaction between MRS and body fat distribution. In line with previous  
310 literature indicating that genus *lactobacillus* might contribute to chronic inflammation  
311 in diabetes development (5, 32), we also found that the family *lactobacillaceae* was  
312 enriched in the T2D participants and had a strong predictive power for T2D. Although  
313 based on the different microbiome analysis method, the two shotgun metagenomics  
314 based studies (27, 28) consistently showed a decrease in *roseburia* species and an  
315 increase in *lactobacillus* species in T2D cases compared to controls. Specially,  
316 *lactobacillus* species had the highest score for the identification of T2D patients in a  
317 European study (28). Due to the translational nature of the present project, we did not  
318 further investigate the functionality of each identified gut microbial taxa, but rather,  
319 we were more interested in the role of the overall microbiome combination and  
320 pattern.

321

322 We developed the concept of MRS for T2D. The MRS could predict future glucose  
323 change prospectively, inferring the potential causality of the identified combination of  
324 microbes in diabetes development, which was confirmed by our faecal microbiota  
325 transplantation study. The prospective investigation of the gut microbiome-glucose  
326 association was rarely conducted by any of the previous cohort studies, which

---

327 exclusively investigated a cross-sectional association of gut microbiome with T2D or  
328 related traits (5, 9, 27, 28, 33–35). Integration of MRS-blood metabolome analysis  
329 revealed potential mechanism of the MRS-T2D association, involving a variety of gut  
330 microbiota-derived metabolites, although the detailed mechanism is yet to be  
331 discovered.

332

333 We further demonstrated that higher BMI or lower hip circumference is positively  
334 associated with future MRS levels, which indicates the potential role of adiposity in  
335 affecting gut microbiome. The evidence is clearer when we found an interaction  
336 between the MRS and trunk to limb fat mass ratio, suggesting that adiposity may be  
337 an effect modifier for gut microbiome and T2D development. Taken together, our  
338 results highlight that a healthy body shape may play an important role in maintaining  
339 the gut health.

340

341 In summary, with a high-accuracy machine learning model and a credible interpreter,  
342 we discover and validate the associations of gut microbiome and the related MRS  
343 with T2D in several large human cohorts. These newly discovered combination of  
344 microbes can be potentially used as T2D diagnostic, therapeutic targets, or preventive  
345 targets through diet and lifestyle intervention. Furthermore, the MRS can potentially  
346 assist in the screening of the best faecal donors for the treatment of T2D patients in  
347 future and improve the clinical therapeutic safety of faecal transplantation.

348

349

350

351

---

352 **Materials and Methods**

353 **Study design**

354 We included participants from three human cohorts, 1832 participants from the  
355 Guangzhou Nutrition and Health Study (GNHS) (36) as a discovery cohort (270 T2D  
356 cases), 203 participants belonged to the control arm of a case-control study of hip  
357 fracture in Guangdong Province, China (37) as an external validation cohort 1 (48  
358 T2D cases), and another 7009 participants from GGMP (Guangdong Gut Microbiome  
359 Project) as an further external validation cohort 2 (608 cases) (23). Detailed study  
360 designs of GNHS have been reported previously(36). Briefly, GNHS is an ongoing  
361 community-based prospective cohort study in Guangzhou, China. There were two  
362 waves of participant recruitment using the same criteria: between 2008 and 2010  
363 (n=3169), and between 2012 and 2013 (n=879). All participants were followed up  
364 every 3 years. Stool samples were collected at the second and third follow-up. Those  
365 with measurement of 16s rRNA from stool samples were included in the present study  
366 (n=1935). Study participants were excluded if they had an unclear diabetes status  
367 (n=48), chronic renal dysfunction or self-reported cancers (n=55). Finally, 1832  
368 participants were included in the present analysis as a discovery cohort, including  
369 1068 individuals (159 T2D cases) with a measurement of shotgun metagenomic  
370 sequence. Among the included participants, there were 249 non-T2D participants,  
371 who were followed up for a median of 3.4 years after the collection of their stool  
372 samples. These participants were included in our longitudinal analysis of gut  
373 microbiome with glucose increments. All 1832 participants were included in our  
374 longitudinal analysis on the prospective association of baseline factors with gut  
375 microbiome (with a median follow up of 6.2 years).

376



---

377 The hip fracture case-control cohort (external validation cohort 1) was performed  
378 between June 2009 and June 2012 in Guangdong Province, China. Detailed  
379 information of this cohort has been reported previously (37). After adopting the same  
380 inclusion and exclusion criteria as GNHS, we included 203 participants with a  
381 measurement of 16s rRNA from stool samples in the present analysis. The study  
382 protocols of GNHS and the hip fracture case-control study were approved by the  
383 Ethics Committee of the School of Public Health at Sun Yat-sen University, and all  
384 participants gave written informed consent.

385

386 Details method for the covariate measurements, stool sample collection, 16s rRNA  
387 sequencing, shotgun metagenome sequencing and taxonomy analysis for GNHS and  
388 hip fracture case-control study was provided in Supplemental text.

389

390 All GGMP participants (external validation cohort 2) were from 14 randomly selected  
391 districts or counties in Guangdong province. In each district or county, three  
392 neighborhoods or townships were selected, and in each neighborhood or township,  
393 two communities or villages were selected (23). Detailed methods for the assessment  
394 of demographic, lifestyle and dietary information, stool sample collection, processing  
395 and 16s sequencing for GGMP have been reported previously (23). The study protocol  
396 was approved by the Ethical Review Committee of the Chinese Center for Disease  
397 and Prevention, and all participants gave written informed consent.

398

### 399 **Interpretable machine learning framework for data integration and explanation**

400 We devised a model based on a gradient boosting framework —LightGBM(13) to link  
401 input features with T2D (detailed parameters were provided in Supplementary text).

402 To train and validate our model, we divided the discovery cohort into three parts  
403 randomly at a ratio of 6:2:2, resulting in 1099, 366 and 367 participants, which were  
404 allocated at the training cohort, internal validation cohort, and internal test cohort,  
405 respectively. The training cohort was used to fit parameters of the model; the internal  
406 validation cohort was used to tune parameters of the model; and the internal test  
407 cohort was used to assess the performance of the model. AUC was used to evaluate  
408 the model's performance. Our predictor is based on code adapted from the sklearn  
409 0.15.2 (38) lightgbm class, R packages pROC (39) were used for ROC curve analyses,  
410 "delong" method for AUC comparison. We also compared our model performance  
411 with that of a random forest algorithm, applying the same evaluation criteria (tenfold  
412 cross-validation in the discovery cohort, independent validation in the external cohort  
413 1).

414

415 We used the SHAP (Shapley Additive exPlanations) (11) integrated into LightGBM to  
416 unlock the machine learning results. The inflection point of SHAP dependence plots  
417 (X-axis represents the feature variable, while Y-axis represents the SHAP value for the  
418 feature variable) were defined as the optimal threshold for each selected feature.

419

#### 420 **Microbiome risk score (MRS) construction**

421 We construct an MRS based on the machine learning-selected microbiome features  
422 and their SHAP values by using the additive model:

$$423 \quad MRS_i = \sum_{j=1}^n s_{ij}$$

424 Where,  $MRS_i$  is a MRS for individual  $i$ ,  $s_{ij} = \begin{cases} 0, & \text{if } x_{shap,ij} < 0 \\ 1, & \text{if } x_{shap,ij} > 0 \end{cases}$ ,  $s_{ij}$  is the

425 microbiome risk score for the  $j$ th microbiome features in  $i$ th individual.  $n$  is the sum

---

426 of the microbiome features, and  $x_{shap,ij}$  is the SHAP value for the  $j$ th microbiome  
427 features in  $i$ th individual. The MRS components including observe species,  
428 *f\_lactobacillaceae*, *c\_alphaproteobacteria*, *f\_mogibacteriaceae*, *g\_clostridiaceae* spp,  
429 *c\_deltaproteobacteria*, *g\_butyrvibrio*, *o\_lactobacillales*, *f\_comamonadaceae*,  
430 *g\_roseburia*, *g\_megamonas*, *g\_mogibacteriaceae* spp, *g\_dorea*, *s\_dispar*.

431

### 432 **Gut microbiota transplantation**

433 Nine participants were randomly selected as the representative donors according to  
434 the level of the MRS (ranges from 0-14):

435 (1) Low MRS group: 3 participants, MRS=0, or MRS=1.

436 (2) High MRS + non-T2D group: 3 participants, MRS=11.

437 (3) High MRS + T2D group: 3 participants, MRS=13, or MRS=14.

438

439 Weaned, germ-free male C57BL/6J mice ( $n = 40$ ) were maintained in flexible-film  
440 plastic isolators under a regular 12-h light cycle (lights on at 06:00). The mice were  
441 fed a sterilized normal chow diet (10% energy from fat; 3.25 kcal/g; SLAC). At 4  
442 weeks of age, the germ-free mice were housed in individual cages and randomly  
443 divided into four groups (each group was kept in an individual isolator). After 1 weeks  
444 of acclimatization, the CON group of mice ( $n = 10$ ) were orally gavaged with 100  $\mu$ L  
445 of normal saline, and the other three groups of mice ( $n = 10$ , per group) were orally  
446 gavaged with 100  $\mu$ L of the fecal suspension inoculum (taken from the each of the  
447 above donor group, preparation methods see supplementary materials). All mice were  
448 fed a sterilized high-fat diet. On Day 0, 7 and 14, after 12 h of fasting, fasting glucose  
449 was measured through the tail vein (Sinocare, China).

450

---

451 Detailed description of fecal suspension inoculum preparation was provided in  
452 Supplementary text. All animal experimental procedures were approved by the Ethics  
453 Committee of Westlake University and were conducted according to the committee's  
454 guidelines.

455

#### 456 **Statistical analysis**

457 Statistical analysis was performed using Stata 15 (StataCorp, College Station, TX,  
458 USA). For the discovery cohort and external validation cohort 1, multivariable  
459 Poisson regression model (with robust standard errors) was used to examine the cross-  
460 sectional association with T2D for each machine-learning identified taxa-related  
461 feature as a continuous variable or as a binary variable: higher abundance (i.e.,  $\geq$ the  
462 optimal threshold) compared with those lower abundance (i.e.,  $<$ the optimal  
463 threshold), adjusted for age, sex, BMI, waist circumference, household income,  
464 marital status, and self-reported educational level, total energy intake, alcohol  
465 drinking, and smoking. For external validation cohort 2, all aforementioned covariates  
466 but total energy intake (not available) were used in the statistical model. We combined  
467 the effect estimates from the 3 cohorts using random-effects meta-analysis.

468

469 With the machine-learning identified MRS, in each of the internal validation cohort,  
470 internal test cohort and external validation cohort 1, we calculated the AUC for T2D  
471 prediction for the MRS, host genetics (T2D genetic risk score), and the traditional  
472 T2D risk factors including the Framingham-Offspring Risk Score (FORS)  
473 components (age, sex, parental history of diabetes, BMI, systolic blood pressure,  
474 high-density lipoprotein cholesterol, triglycerides, and waist circumference), lifestyle  
475 and dietary factors (current smoking status, current tea-drinking, current alcohol

---

476 drinking, physical activity, total energy intake, vegetable intake, fish intake, red and  
477 processed meat intake, fruit intake and yogurt intake). ROC curves were compared  
478 with a paired two-sided DeLong's test using the pROC package in R (23).

479

480 We also used a Poisson regression model (with robust standard errors) to explore the  
481 cross-sectional association of the MRS with T2D risk in our discovery cohort, and  
482 two external validation cohorts, respectively, adjusted for the same covariates as  
483 above individual taxa analysis. Given the information on household income was  
484 missing for many participants (n=2566, 37.8%) in external validation cohort 2, we  
485 performed sensitivity analysis by excluding household income as a covariate.

486

487 We used a linear regression model to explore the association of baseline MRS with  
488 glucose increments in the next 3 years, adjusted for the demographic and dietary and  
489 lifestyle factors. Sensitivity analysis was conducted by adding baseline fasting glucose  
490 to test the influence of baseline fasting glucose on the performance of the above  
491 model.

492

493 The association of the MRS with host circulating metabolites was assessed by the  
494 Spearman correlation. Those MRS-metabolite associations survived the multiple test  
495 correction (Benjamini and Hochberg method) in the discovery cohort were further  
496 chosen for replication in the external validation cohort 1.

497

498 In the discovery cohort, linear regression was used to estimate the difference in MRS  
499 per quartile change for continuous dietary factors or per unit change for adiposity  
500 factors or per category change for categorical (ordinary) factors in the baseline tested

---

501 factors, adjusted for demographic factors, T2D medication use, and mutually adjusted  
502 for the other tested adiposity, dietary and lifestyle factors. The tested adiposity, dietary  
503 and lifestyle factors including BMI, hip circumference, waist circumference, neck  
504 circumference, total energy intake, alcohol drinking, smoking, tea drinking, vegetable  
505 intake, fruit intake, fish intake, red and processed meat intake, yogurt intake and  
506 physical activity. The adjusted demographic factors including age, sex, household  
507 income, marital status and educational level.

508

509 In both the discovery cohort and the external validation cohort 1, we used a linear  
510 regression model to assess the cross-sectional association of MRS with body fat  
511 distribution, adjusted for age, sex, total energy intake, alcohol drinking, smoking,  
512 household income, marital status and educational level. In both cohorts, Poisson  
513 regression was used to estimate the interaction of MRS with trunk fat to limb fat mass  
514 ratio on T2D risk, adjusted for the demographic, dietary and lifestyle factors.

515

516 For the results of the animal study, ANOVA was used for comparison between  
517 multiple groups. The *P*-values were adjusted using the Benjamini and Hochberg  
518 method. *P* values <0.05 were considered significant.

519

520

521

522

523

524

525

---

## References

1. P. W. Franks, M. I. McCarthy, Exposing the exposures responsible for type 2 diabetes and obesity. *Science* (80-. ). **354**, 69–73 (2016).
2. J. B. Bin Zhou, Yuan Lu, Kaveh Hajifathalian, Worldwide trends in diabetes since 1980 : a pooled analysis of 751 population-based studies with 4 · 4 million participants. *Lancet*. **387**, 1513–1530 (2016).
3. K. H. Allin, T. Nielsen, O. Pedersen, Mechanisms in endocrinology: Gut microbiota in patients with type 2 diabetes mellitus. *Eur. J. Endocrinol.* **172**, R167–R177 (2015).
4. H. Tilg, A. R. Moschen, Microbiota and diabetes: An evolving relationship. *Gut*. **63**, 1513–1521 (2014).
5. N. Larsen, F. K. Vogensen, F. W. J. Van Den Berg, D. S. Nielsen, A. Sofie, B. K. Pedersen, W. A. Al-soud, S. J. Sørensen, L. H. Hansen, Gut Microbiota in Human Adults with Type 2 Diabetes Differs from Non-Diabetic Adults. *PLoS One*. **5**, e9085 (2010).
6. P. D. Cani, Human gut microbiome: hopes, threats and promises. *Gut*. **67**, 1716–1725 (2018).
7. L. Brunkwall, M. Orho-Melander, The gut microbiome as a target for prevention and treatment of hyperglycaemia in type 2 diabetes: from current human evidence to future possibilities. *Diabetologia*. **60**, 943–951 (2017).
8. J. F. Petrosino, The microbiome in precision medicine : the way forward. *Genome Med.*, 10–13 (2018).
9. M. Gurung, Z. Li, H. You, R. Rodrigues, D. B. Jump, A. Morgun, N. Shulzhenko, Role of gut microbiota in type 2 diabetes pathophysiology. *EBioMedicine*. **51** (2020), doi:10.1016/j.ebiom.2019.11.051.

- 
10. I. S. Beam, Andrew L., Kohane, Big Data and Machine Learning in Health Care. *JAMA*. **319** (2018), doi:10.1001/jama.2017.18391.
  11. S.-I. Lundberg, Scott, Lee, A Unified Approach to Interpreting Model Predictions. *NIPS* (2017).
  12. S. Canivell, R. Gomis, Diagnosis and classification of autoimmune diabetes mellitus. *Autoimmun. Rev.* **13**, 403–407 (2014).
  13. Q. Ke, Guolin, Meng, T. Finley, Thomas Wang, W. Chen, W. Ma, Q. Ye, T.-Y. Liu, LightGBM: A Highly Efficient Gradient Boosting Decision Tree. *NIPS* (2017).
  14. W. Jia, Z. Zhou, J. Dou, J. Weng, D. Zou, J. Lu, Standards of medical care for type 2 diabetes in China 2019. *Diabetes Metab Res Rev.* **35**, 1–26 (2019).
  15. C. D. Society, China Guideline for Type 2 Diabetes (2017 Edition) . *CJDM*. **10**, 34–86 (2018).
  16. H. K. Pedersen, V. Gudmundsdottir, H. B. Nielsen, T. Hyotylainen, T. Nielsen, B. A. H. Jensen, K. Forslund, F. Hildebrand, E. Prifti, G. Falony, E. Le Chatelier, F. Levenez, J. Doré, I. Mattila, D. R. Plichta, P. Pöhö, L. I. Hellgren, M. Arumugam, S. Sunagawa, S. Vieira-silva, T. Jørgensen, J. B. Holm, K. Trošt, M. Consortium, K. Kristiansen, S. Brix, J. Raes, J. Wang, T. Hansen, P. Bork, S. Brunak, M. Oresic, S. D. Ehrlich, O. Pedersen, Human gut microbes impact host serum metabolome and insulin sensitivity. *Nature*. **535**, 376–381 (2016).
  17. A. Aura, Microbial metabolism of dietary phenolic compounds in the colon, 407–429 (2008).
  18. V. R. Velagapudi, R. Hezaveh, C. S. Reigstad, P. Gopalacharyulu, L. Yetukuri, S. Islam, J. Felin, R. Perkins, J. Borén, M. Ore, The gut microbiota modulates



- 
- host energy and lipid metabolism in mice (2010), doi:10.1194/jlr.M002774.
19. J. Felin, S. Ja, H. Marschall, K. Bamberg, B. Angelin, S. I. Sayin, A. Wahlstro, Gut Microbiota Regulates Bile Acid Metabolism by Reducing the Levels of Tauro-beta-muricholic Acid , a Naturally Occurring FXR Antagonist. *Cell Metabolism*. **17**, 225–235 (2013).
  20. Y. Yu, F. Raka, The Role of the Gut Microbiota in Lipid and Lipoprotein Metabolism. *J. Clin. Med.* **8** (2019).
  21. S. E. Kahn, R. L. Hull, K. M. Utzschneider, Mechanisms linking obesity to insulin resistance and type 2 diabetes. *Nature*. **444**, 840–846 (2006).
  22. Y. Xia, J. Sun, Hypothesis testing and statistical analysis of microbiome. *Genes Dis.* **4**, 138–148 (2017).
  23. Y. He, W. Wu, H. M. Zheng, P. Li, D. McDonald, H. F. Sheng, M. X. Chen, Z. H. Chen, G. Y. Ji, Z. D. X. Zheng, P. Mujagond, X. J. Chen, Z. H. Rong, P. Chen, L. Y. Lyu, X. Wang, C. Bin Wu, N. Yu, Y. J. Xu, J. Yin, J. Raes, R. Knight, W. J. Ma, H. W. Zhou, Regional variation limits applications of healthy gut microbiome reference ranges and disease models. *Nat. Med.* **24**, 1532–1535 (2018).
  24. A. Zhernakova, A. Kurilshikov, M. J. Bonder, E. F. Tigchelaar, M. Schirmer, T. Vatanen, Z. Mujagic, A. V. Vila, G. Falony, S. Vieira-Silva, J. Wang, F. Imhann, E. Brandsma, S. A. Jankipersadsing, M. Joossens, M. C. Cenit, P. Deelen, M. A. Swertz, R. K. Weersma, E. J. M. Feskens, M. G. Netea, D. Gevers, D. Jonkers, L. Franke, Y. S. Aulchenko, C. Huttenhower, J. Raes, M. H. Hofker, R. J. Xavier, C. Wijmenga, J. Fu, Population-based metagenomics analysis reveals markers for gut microbiome composition and diversity. *Science (80-. )*. **352**, 565–569 (2016).

- 
25. G. Falony, M. Joossens, S. Vieira-silva, J. Wang, Y. Darzi, K. Faust, A. Kurilshikov, M. J. Bonder, M. Valles-colomer, D. Vandeputte, R. Y. Tito, S. Chaffron, L. Rymenans, C. Verspecht, L. De Sutter, G. Lima-mendez, D. Kevin, K. Jonckheere, D. Homola, R. Garcia, E. F. Tigchelaar, L. Eeckhautd, J. Fu, L. Henckaerts, A. Zhernakova, C. Wijmenga, J. Raes, Population-level analysis of gut microbiome variation. *Science (80-. )*. **352**, 560–564 (2016).
  26. S. M. Lundberg, G. G. Erion, S. Lee, Consistent Individualized Feature Attribution for Tree Ensembles (2017).
  27. J. Qin, Y. Li, Z. Cai, S. Li, J. Zhu, F. Zhang, S. Liang, W. Zhang, Y. Guan, D. Shen, Y. Peng, D. Zhang, Z. Jie, W. Wu, Y. Qin, W. Xue, J. Li, L. Han, D. Lu, P. Wu, Y. Dai, X. Sun, Z. Li, A. Tang, S. Zhong, X. Li, W. Chen, R. Xu, M. Wang, Q. Feng, M. Gong, J. Yu, Y. Zhang, M. Zhang, T. Hansen, G. Sanchez, J. Raes, G. Falony, S. Okuda, M. Almeida, E. Lechatelier, P. Renault, N. Pons, J. M. Batto, Z. Zhang, H. Chen, R. Yang, W. Zheng, S. Li, H. Yang, S. D. Ehrlich, R. Nielsen, O. Pedersen, K. Kristiansen, J. Wang, A metagenome-wide association study of gut microbiota in type 2 diabetes. *Nature*. **490**, 55–60 (2012).
  28. F. H. Karlsson, V. Tremaroli, I. Nookaew, G. Bergström, C. J. Behre, B. Fagerberg, J. Nielsen, F. Bäckhed, Gut metagenome in European women with normal, impaired and diabetic glucose control. *Nature*. **498** (2013), pp. 99–103.
  29. K. K. Ryan, V. Tremaroli, C. Clemmensen, P. Kovatcheva-Datchary, A. Myronovych, R. Karns, H. E. Wilson-Pérez, D. A. Sandoval, R. Kohli, F. Bäckhed, R. J. Seeley, FXR is a molecular target for the effects of vertical sleeve gastrectomy. *Nature*. **509**, 183–188 (2014).
  30. S. Sanna, N. R. Van Zuydam, A. Mahajan, A. Kurilshikov, A. V. Vila, Z.

- 
- Mujagic, A. A. M. Masclee, M. Oosting, L. A. B. Joosten, M. G. Netea, L. Franke, J. Fu, C. Wijmenga, M. I. McCarthy, C. Hospital, D. Gastroenterology-hepatology, K. G. J. Coeliac, J. R. Hospital, Causal relationships between gut microbiome, short-chain fatty acids and metabolic diseases. *Nat Genet.* **51**, 600–605 (2019).
31. C. Petersen, R. Bell, K. A. Klag, S. Lee, R. Soto, A. Ghazaryan, K. Buhrke, H. A. Ekiz, K. S. Ost, S. Boudina, R. M. O. Connell, J. E. Cox, C. J. Villanueva, W. Z. Stephens, J. L. Round, T cell – mediated regulation of the microbiota protects against obesity. *Science (80-. ).* **365** (2019), doi:10.1126/science.aat9351.
32. L. H. Zeuthen, H. R. Christensen, Lactic Acid Bacteria Inducing a Weak Interleukin-12 and Tumor Necrosis Factor Alpha Response in Human Dendritic Cells Inhibit Strongly Stimulating Lactic Acid Bacteria but Act Synergistically with Gram-Negative Bacteria. *Clin Vaccine Immunol.* **13**, 365–375 (2006).
33. F. Ikeda, T. Yoshihara, K. Komiya, M. Kawaguchi, Gut Dysbiosis and Detection of “ Live Gut Bacteria ” in Blood of Japanese Patients With Type 2 Diabetes. *Diabetes Care.* **37**, 2343–2350 (2014).
34. A. Sircana, L. Framarin, N. Leone, M. Berrutti, F. Castellino, R. Parente, F. De Michieli, E. Paschetta, G. Musso, Altered Gut Microbiota in Type 2 Diabetes : Just a Coincidence ? *Curr. Diab. Rep.* **18** (2018).
35. X. Zhang, D. Shen, Z. Fang, Z. Jie, X. Qiu, C. Zhang, Human Gut Microbiota Changes Reveal the Progression of Glucose Intolerance. *PLoS One.* **8**, e71108 (2013).
36. Z. Zhang, L. He, Y. Liu, J. Liu, Y. Su, Y. Chen, Association between dietary intake of flavonoid and bone mineral density in middle aged and elderly

- 
- Chinese women and men. *Osteoporos Int.* **25**, 2417–2425 (2014).
37. F. Fan, W. Xue, B. Wu, M. He, H. Xie, W. Ouyang, Y. Chen, Higher Fish Intake Is Associated with a Lower Risk of Hip Fractures in Chinese Men and Women : A Matched Case- Control Study. *PLoS One.* **8**, e56849 (2013).
38. F. Pedregosa, R. Weiss, M. Brucher, Scikit-learn : Machine Learning in Python. **12**, 2825–2830 (2011).
39. X. Robin, N. Turck, A. Hainard, N. Tiberti, F. Lisacek, J. Sanchez, M. Müller, pROC : an open-source package for R and S + to analyze and compare ROC curves. *BMC Bioinformatics.* **12** (2011), doi:10.1186/1471-2105-12-77.
40. H. S. Zhang CX, Validity and reproducibility of a food frequency Questionnaire among Chinese women in Guangdong province. *Asia Pac J Clin Nutr.* **18**, 240–250 (2009).
41. B. Liu, J. Woo, N. Tang, K. Ng, R. Ip, A. Yu, Assessment of total energy expenditure in a Chinese population by a physical activity questionnaire : examination of validity. *Int J Food Sci Nutr.* **52**, 269–282 (2001).
42. Y. Chen, Y. Liu, Y. Liu, X. Wang, K. Guan, H. Zhu, Higher serum concentrations of betaine rather than choline is associated with better profiles of DXA-derived body fat and fat distribution in Chinese adults. **39**, 465–471 (2014).
43. J. G. Caporaso, J. Kuczynski, J. Stombaugh, K. Bittinger, F. D. Bushman, E. K. Costello, N. Fierer, A. G. Peña, K. Goodrich, J. I. Gordon, G. A. Huttley, S. T. Kelley, D. Knights, E. Jeremy, R. E. Ley, C. A. Lozupone, D. McDonald, B. D. Muegge, J. Reeder, J. R. Sevinsky, P. J. Turnbaugh, W. A. Walters, QIIME allows analysis of high-throughput community sequencing data. *Nat Methods.* **7**, 335–336 (2010).

- 
44. R. Schmieder, R. Edwards, Quality control and preprocessing of metagenomic datasets. *Bioinformatics*. **27**, 863–864 (2011).
  45. S. L. S. Ben Langmead, Fast gapped-read alignment with Bowtie 2. *Nat Methods*. **9**, 357–359 (2012).
  46. G. Senavirathne, J. Liu, M. A. L. Jr, J. Hanne, J. Martin-lopez, J. Lee, K. E. Yoder, R. Fishel, MetaPhlAn2 for enhanced metagenomic taxonomic profiling. *Nat Methods*. **12**, 902–903 (2015).
  47. W. Gan, R. G. Walters, M. V. Holmes, F. Bragg, I. Y. Millwood, K. Banasik, Y. Chen, H. Du, A. Iona, A. Mahajan, L. Yang, Z. Bian, Y. Guo, R. J. Clarke, L. Li, M. I. McCarthy, Z. Chen, Evaluation of type 2 diabetes genetic risk variants in Chinese adults: findings from 93,000 individuals from the China Kadoorie Biobank. *Diabetologia*. **59**, 1446–1457 (2016).

---

**Acknowledgments** We thank all of the participants of the cohorts for contributing stool samples and phenotypes. **Funding:** This study was funded by National Natural Science Foundation of China (81903316, 81773416), Zhejiang Province Ten-thousand Talents Program (101396522001), Westlake University (101396021801) and the 5010 Program for Clinical Researches (2007032) of the Sun Yat-sen University (Guangzhou, China). **Author contributions:** Conceptualization, J.S.Z., W.L.G., Y.M.C.; Methodology, J.S.Z and W.L.G.; Formal Analysis, W.L.G. and Z.L.J.; Investigation, C.W.L., Y.H., J.S.L., T.Y.S., and H.L.Z.; Data curation, C.W.L., Y.H., F.Z.X. and Z.L.M.; Resources, Y.M.C., H.W.Z. and J.S.Z.; Writing, W.L.G. and J.S.Z.; Writing-Review & Editing, J.S.Z., W.L.G., Y.Q.F., H.W.Z., Y.M.C., Y.H., Z.L.J., C.W.L., F.Z.X., Z.L.M., T.Y.S., J.S.L., and H.L.Z.; Visualization, W.L.G.; Supervision, J.S.Z., Y.M.C., and H.W.Z.; Funding Acquisition, J.S.Z., Y.M.C. and H.W.Z. **Competing interests:** The authors declare no conflict of interest. **Data and materials availability:** For the discovery and external validation cohort 1, the raw data for 16 S rRNA gene sequences are available in the CNSA (<https://db.cngb.org/cnsa/>) of CNGBdb at accession number CNP0000829. For the external validation cohort 2, the raw data for 16 S rRNA gene sequences are available from the European Nucleotide Archive (<https://www.ebi.ac.uk/ena/>) at accession number PRJEB18535.

**Table 1. Characteristics of the participants included in this study\***

| Factors                             | Discovery cohort | External validation cohort 1 | External validation cohort 2 |
|-------------------------------------|------------------|------------------------------|------------------------------|
| No of participants                  | 1832             | 203                          | 7009                         |
| No of type 2 diabetes cases (%)     | 270 (14.7%)      | 48 (23.6%)                   | 608 (8.7%)                   |
| Age (year)                          | 64.8 (5.9)       | 71.7 (6.9)                   | 52.7 (14.7)                  |
| Sex (%)                             |                  |                              |                              |
| Women                               | 1223 (66.9%)     | 152 (74.9%)                  | 3848 (54.9%)                 |
| Men                                 | 605 (33.1%)      | 51 (25.1%)                   | 3161 (45.1%)                 |
| Marital status, %                   |                  |                              |                              |
| Married                             | 1663 (91.0%)     | 148 (72.9%)                  | 6322 (90.3%)                 |
| Others                              | 165 (9.0%)       | 55 (27.1%)                   | 682 (9.7%)                   |
| Education, %                        |                  |                              |                              |
| Middle school or lower              | 490 (26.8%)      | 28 (14.6%)                   | 5326 (76.0%)                 |
| High school or professional college | 846 (46.3%)      | 34 (17.7%)                   | 1398 (19.9%)                 |
| University                          | 492 (26.9%)      | 130 (67.7%)                  | 280 (4.0%)                   |
| Unknow                              |                  |                              | 5 (0.1%)                     |
| Income (Yuan/month/person), %       |                  |                              |                              |
| ≤500                                | 27 (1.5%)        | 1 (0.5%)                     | 834 (11.9%)                  |
| 501-1500                            | 388 (21.2%)      | 3 (1.5%)                     | 2067 (29.5%)                 |
| 1501-3000                           | 1175 (64.3%)     | 30 (15.1%)                   | 996 (14.2%)                  |
| >3000                               | 238 (13.0%)      | 165 (82.9%)                  | 481 (6.9%)                   |
| Unknow                              |                  |                              | 2631 (37.5%)                 |
| Height, cm                          | 158.4 (10.4)     | 154.7 (11.8)                 | 158.0 (8.5)                  |
| Weight, kg                          | 59.4 (10.2)      | 58.3 (9.9)                   | 58.5 (10.9)                  |
| BMI, kg/m <sup>2</sup>              | 23.6 (3.4)       | 25.5 (15.5)                  | 23.4 (3.5)                   |
| Waist circumference, cm             | 85.2 (9.3)       | 83.5 (9.9)                   | 80.3 (9.9)                   |
| Hip circumference, cm               | 91.7 (11.6)      | 91.3 (6.6)                   |                              |
| Neck circumference, cm              | 34.0 (3.2)       | 33.2 (2.9)                   |                              |
| DBP, mmol/L                         | 74.0 (12.3)      | 74.1 (9.5)                   | 77.7 (11.5)                  |
| SBP, mmol/L                         | 120.8 (17.0)     | 125.6 (16.3)                 | 131.7 (21.7)                 |
| Fasting glucose, mmol/L             | 5.5 (1.3)        | 5.7 (1.3)                    | 5.6 (1.7)                    |
| HDL, mmol/L                         | 1.5 (0.4)        | 1.5 (0.4)                    | 1.3 (0.5)                    |
| LDL, mmol/L                         | 3.6 (1.0)        | 3.6 (1.1)                    | 3.3 (0.9)                    |
| TC, mmol/L                          | 5.5 (1.1)        | 5.6 (1.3)                    | 5.3 (0.9)                    |
| TG, mmol/L                          | 1.6 (1.1)        | 1.7 (1.9)                    | 1.4 (1.6)                    |
| Current smoking status              | 144 (7.9%)       | 27 (14.1%)                   | 1815 (26.1%)                 |
| Current tea drinking                | 1051 (57.7%)     | 108 (56.3%)                  |                              |
| Current alcohol drinking            | 136 (7.4%)       | 19 (9.9%)                    | 2752 (39.3%)                 |
| Physical activity, MET              | 40.6 (14.1)      | 91.6 (51.1)                  |                              |
| Total energy intake, kcal/d         | 1763.1 (568.3)   | 1631.0 (570.5)               |                              |
| Vegetable intake, g/d               | 369.4 (176.8)    | 427.0 (201.3)                | 336.3 (229.2)                |
| Fish intake, g/d                    | 50.5 (51.9)      | 43.0 (50.0)                  |                              |
| Red and processed meat intake, g/d  | 83.6 (62.3)      | 72.0 (47.0)                  | 131.2 (133.8)                |
| Fruit intake, g/d                   | 150.9 (198.5)    | 132.1 (84.5)                 | 79.4 (133.6)                 |
| Yogurt intake, g/d (dry weight)     | 4.7 (15.6)       | 3.8 (6.2)                    |                              |

\*Data were present as no of participants (%) or as mean (SD)

**Table 2. Association of the gut microbiome risk score (MRS) with type 2 diabetes\***

| Cohorts                             | Median (MRS) | No. of cases / Total No. | Adjusted risk ratio (95% CI) | P value |
|-------------------------------------|--------------|--------------------------|------------------------------|---------|
| <b>Discovery cohort</b>             |              |                          |                              |         |
| Q1                                  | 3            | 33 / 569                 | 1 (reference)                |         |
| Q2                                  | 5            | 62 / 515                 | 2.02 (1.35, 3.02)            | <0.001  |
| Q3                                  | 7            | 70 / 419                 | 2.73 (1.85, 4.04)            | <0.001  |
| Q4                                  | 10           | 101 / 304                | 5.29 (3.66, 7.65)            | <0.001  |
| <b>External validation cohort 1</b> |              |                          |                              |         |
| Q1                                  | 4            | 7 / 65                   | 1 (reference)                |         |
| Q2                                  | 6            | 4 / 31                   | 1.47 (0.49, 4.43)            | 0.49    |
| Q3                                  | 7            | 15 / 53                  | 2.6 (1.17, 5.79)             | 0.019   |
| Q4                                  | 10           | 17 / 39                  | 4.17 (1.96, 8.85)            | <0.001  |
| <b>External validation cohort 2</b> |              |                          |                              |         |
| Q1                                  | 6            | 236 / 3065               | 1 (reference)                |         |
| Q2                                  | 7            | 147 / 1672               | 1.11 (0.91, 1.35)            | 0.31    |
| Q3                                  | 8            | 110 / 1104               | 1.27 (1.03, 1.57)            | 0.025   |
| Q4                                  | 9            | 104 / 946                | 1.36 (1.10, 1.68)            | 0.0051  |

\*Poisson regression was used to estimate the risk ratio (RR) and 95% confidence interval (CI) of the type 2 diabetes in each of the three cohorts, according to the gut microbiome risk score. In these comparisons, participants at low microbiome risk (Q1) were treated as the reference group. The covariates for the discovery cohort and validation cohort 1 were total energy intake, age, waist circumference, sex, BMI, alcohol status, smoking status, education, marital status and income. For the validation cohort 2 (GGMP), covariates including age, waist circumference, sex, BMI, alcohol status, smoking status, education, marital status.



---

**Fig.1. Study overview. (A)** Identifying microbiome features, together with their optimal threshold and direction associated with type 2 diabetes (T2D). 1) Training and optimizing a machine-learning model to link the input factors with T2D in a discovery cohort (n=1832, 270 cases); 2) Using SHAP method to explain the output of machine learning model and identify the microbiome features associated with T2D risk; 3) Constructing a microbiome risk score (MRS) for T2D integrating the threshold and direction of the above-identified microbiome features. 4) Validating the MRS-T2D association in two independent external validation cohorts: cohort 1 (n=203, 48 cases), cohort 2 (n=7009, 608 cases); 5) Demonstrating a causal role of the identified microbiome in the T2D development by faecal microbiota transplantation (FMT). **(B)** Investigating the prospective association of baseline adiposity, dietary and lifestyle factors with the identified T2D-related microbiome features (i.e., MRS), and the correlation of the MRS with host serum metabolome. Further, we investigated the role of body fat distribution linking the MRS and T2D development in the discovery cohort and external validation cohort 1.

A.

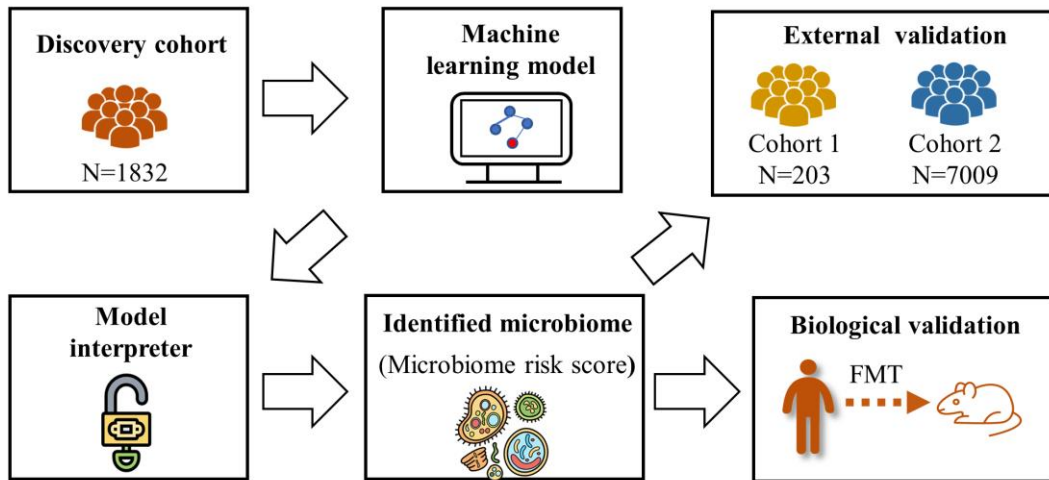

B.

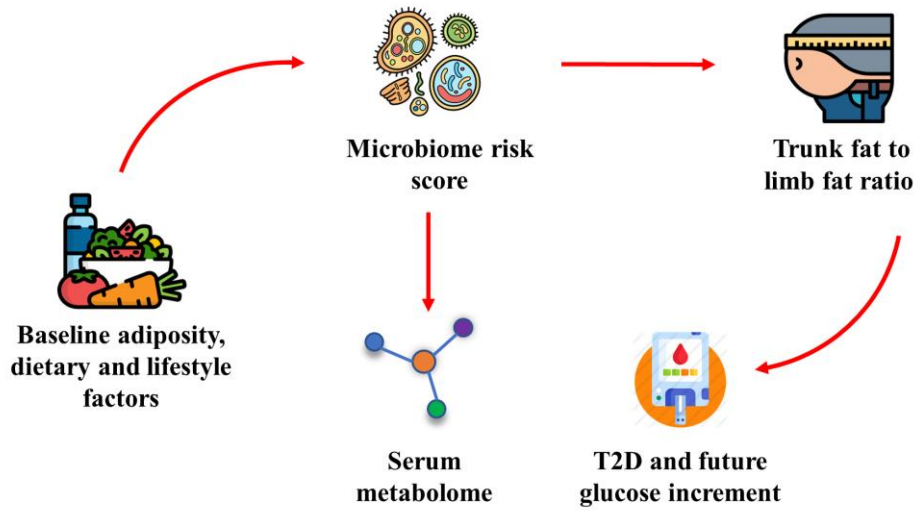

---

**Fig.2. Linking host multi-dimensional information and type 2 diabetes (T2D) based on an interpretable machine learning framework. (A)** Receiver Operator Characteristic curves (ROC curves) of the predictive models based on all 297 input features in the discovery cohort and external validation cohort 1. **(B)** The average impact of selected features on T2D risk. The bars are colored according to data categories. **(C-D)** The inter-correlation of selected microbiome features in the discovery cohort and external validation cohort 1. **(E)** ROC curves of the predictive models based on the selected features (n=21) in the discovery cohort and external validation cohort 1. **(F)** Algorithm performance in the discovery cohort and external validation cohort 1 based on the selected microbiome features, host genetics, lifestyle and diet, T2D traditional risk factors (FORS), and their combination.

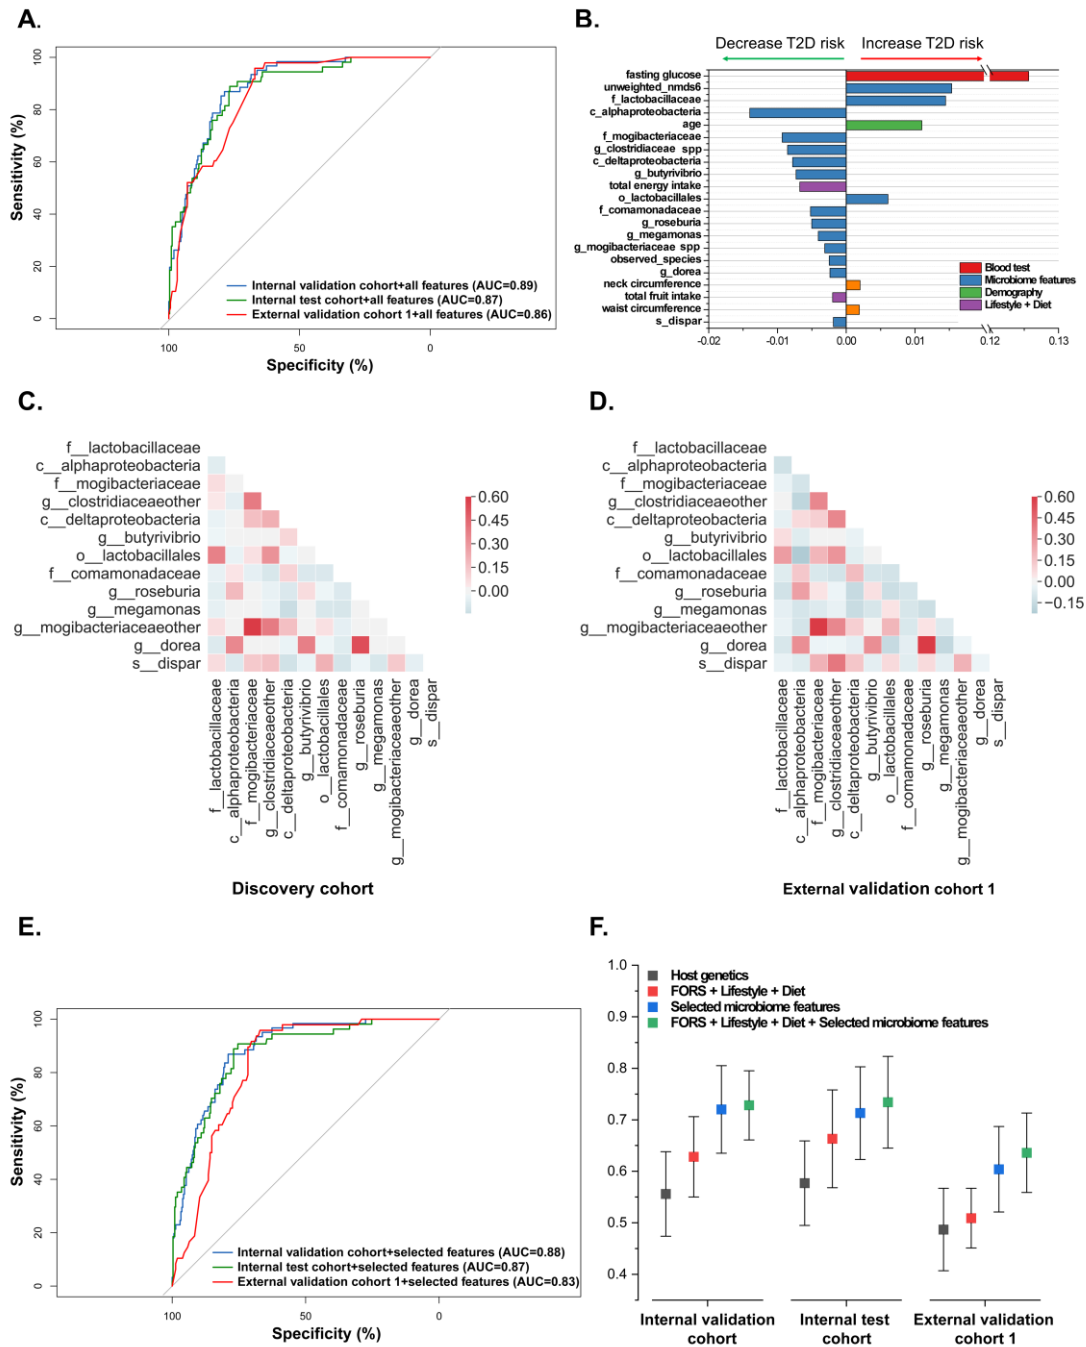

---

**Fig.3. Identified gut microbiota affect the type 2 diabetes (T2D) development and**

**host serum metabolites. (A)** Association of the microbiome risk score (MRS) with T2D risk in discovery cohorts, external validation cohort 1, and external validation cohort 2. Poisson regression was used to estimate the risk ratio (RR) and 95% confidence interval (CI) of T2D per unit change in the MRS, adjusting for demographic, dietary and lifestyle factors. **(B)** Association between the MRS and prospective glucose increments over 3 years in discovery cohort. Linear regression was used to estimate the difference in future fasting glucose per unit change in the MRS in a cohort of 249 non-T2D individuals, adjusted for demographic, dietary and lifestyle factors (model 1). Sensitivity analyses were conducted under model 1 by plus baseline fasting glucose to test the influence of baseline fasting glucose on the performance of our model (model 2). **(C)** Association of the microbiome risk score (MRS) with host circulating metabolites. The Spearman correlation coefficients between the microbiome risk score and the host serum metabolites were calculated. The MRS- metabolite associations were further replicated in the external validation cohort 1. \*  $P < 0.05$ , #  $P < 0.01$ , +  $P < 0.001$ . **(D-F)** Identified gut microbiota causally affect the type 2 diabetes (T2D) development in germ-free mice. **(D)** Schematic diagram. **(E)** Fasting glucose curves. **(F)** Quantification of fasting glucose by AUC. \* compared with CON group, # compared with Low MRS group, + compared with High MRS+non-T2D group. (\*, #, +)  $P < 0.05$ , (\*\*, ##, ++)  $P < 0.01$ , (\*\*\*, ###, +++)  $P < 0.001$  by ANOVA. The  $P$ -values were adjusted using the Benjamini and Hochberg method.

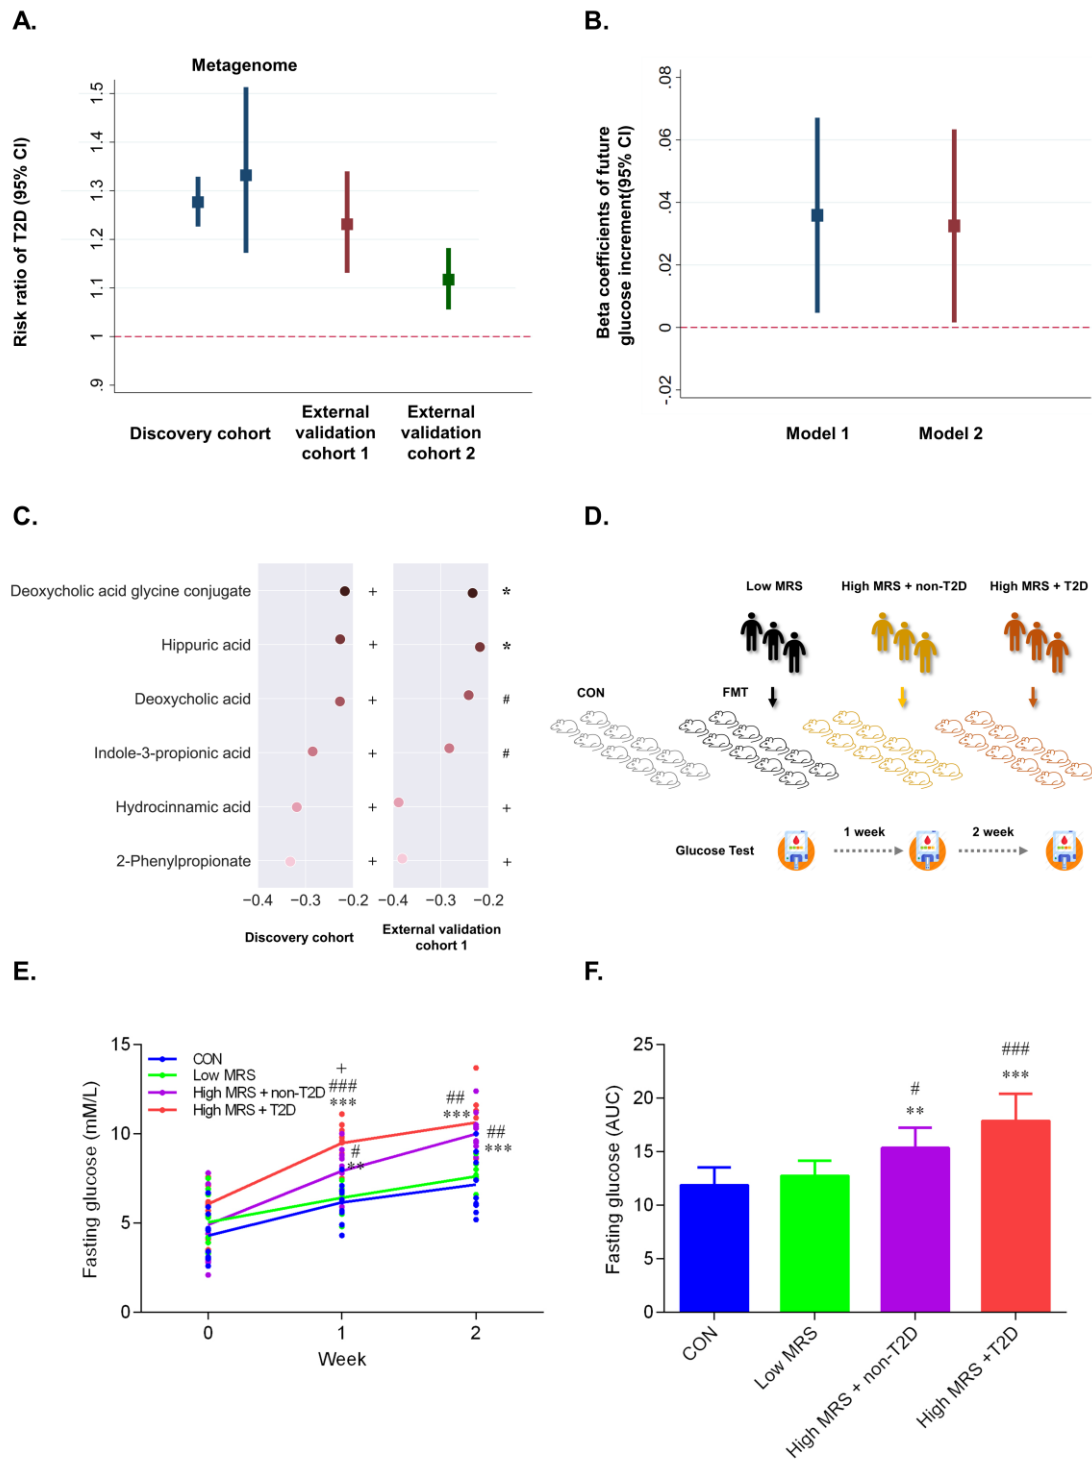

---

**Fig.4. Adiposity and dietary factors modulate the association between gut**

**microbiome and type 2 diabetes (T2D).** **(A)** Association of baseline adiposity and dietary factors with the microbiome risk score (MRS). Linear regression was used to estimate the difference in MRS per quartile (for continuous dietary factors) or per unit (for adiposity factors) or per category (for ordinary factors) change in the baseline tested factors, adjusted for demographic factors, T2D medication use, and mutually adjusted for the other tested adiposity, dietary and lifestyle factors. We only presented those adiposity, dietary or lifestyle factors showing significant association with the MRS in the figure. **(B)** Association between the MRS and trunk fat to limb fat mass ratio in discovery cohort and external validation cohort 1. Linear regression was used to estimate the difference in trunk fat to limb fat mass ratio per unit change in the MRS, adjusted for demographic, dietary and lifestyle factors. **(C)** Interaction between MRS and trunk fat to limb fat mass ratio on T2D risk. Poisson regression was used to estimate the interaction of MRS and trunk fat to limb fat mass ratio on T2D risk, adjusted for demographic, dietary and lifestyle factors

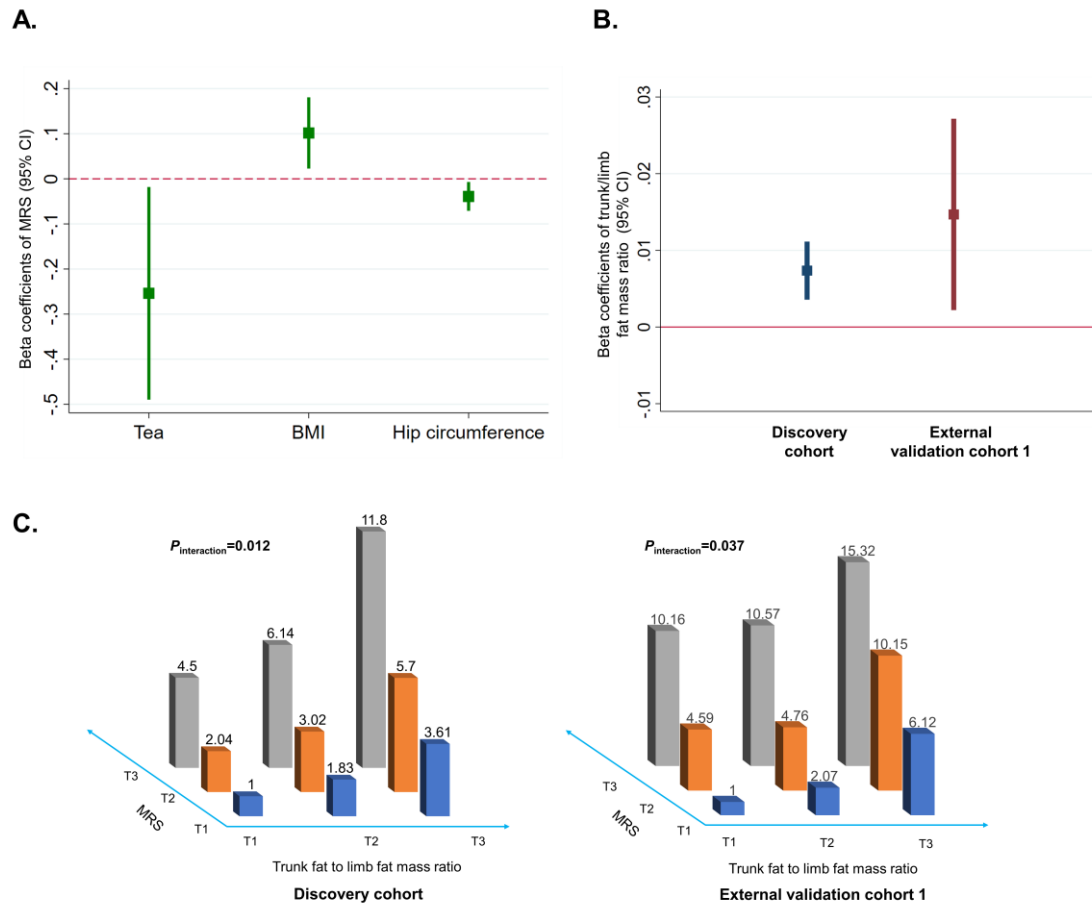

Source: https://www.biorxiv.org/content/10.1101/2020.04.05.024984v1.full.pdf
